# Supplementary material for: Chemical characterization of fine particulate matter in Changzhou, China, and source apportionment with offline aerosol mass spectrometry
Source: Copernicus journal article supplement (doi:10.5194/acp-17-2573-2017), 2017-02-20
Supplement: Supplementary file [file acp-17-2573-2017-supplement.pdf]

Supplement of Atmos. Chem. Phys., 17, 2573–2592, 2017  
<http://www.atmos-chem-phys.net/17/2573/2017/>  
doi:10.5194/acp-17-2573-2017-supplement  
© Author(s) 2017. CC Attribution 3.0 License.

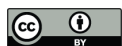

Atmospheric  
Chemistry  
and Physics  
Open Access  
EGU

*Supplement of*

## **Chemical characterization of fine particulate matter in Changzhou, China, and source apportionment with offline aerosol mass spectrometry**

**Zhaolian Ye et al.**

*Correspondence to:* Xinlei Ge (caxinra@163.com)

The copyright of individual parts of the supplement might differ from the CC-BY 3.0 licence.

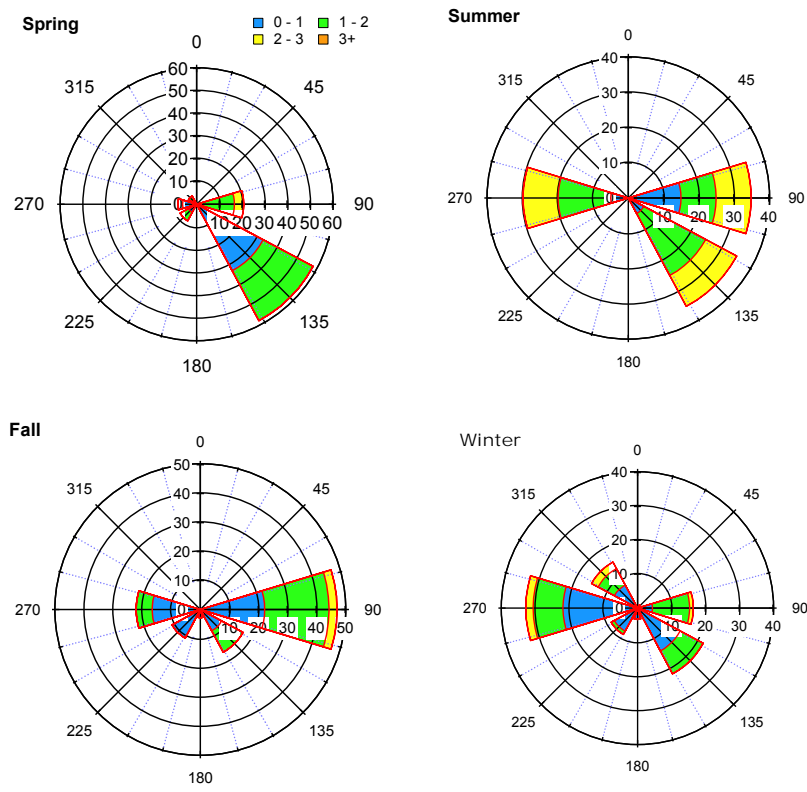

Figure S1. Wind rose plots for the entire sampling period.

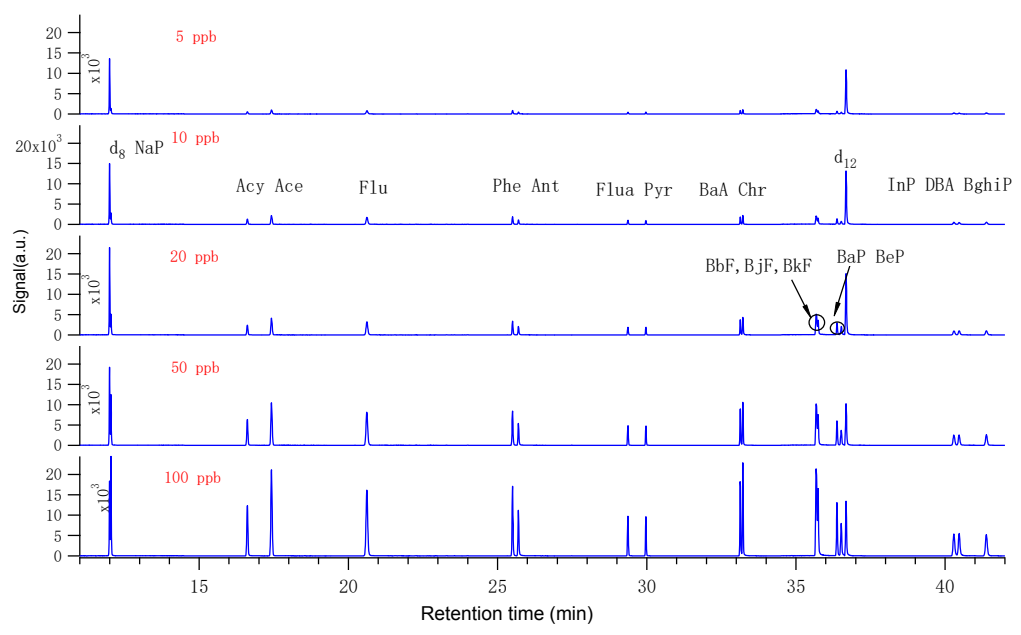

Figure S2. GC-MS spectra of a few standard solutions with 18 PAHs, and two solutions with naphthalene ( $d_8$ ) and perylene ( $d_{12}$ ).

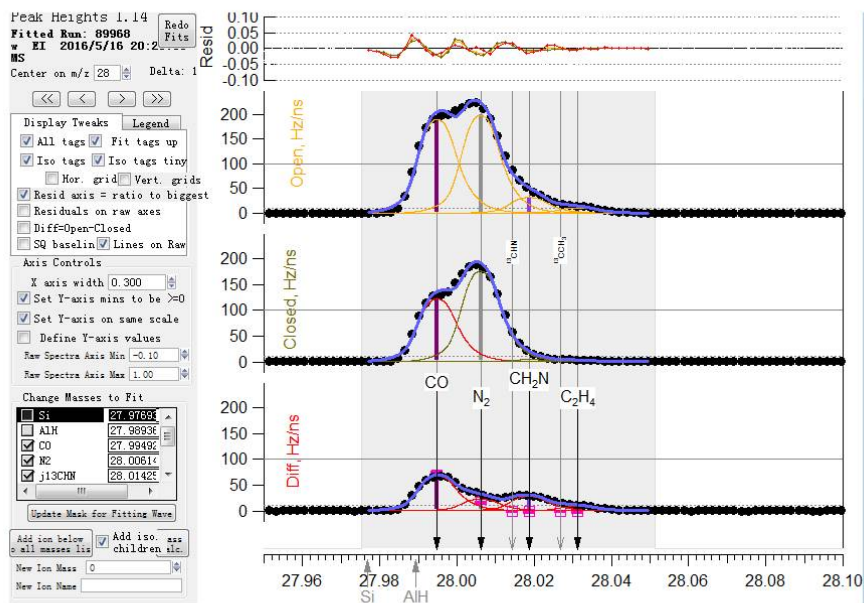

Figure S3. Peak fitting panel for the ions analyzed at  $m/z$  28 (W mode data). Blue line represents Gaussian fit, open black circles represent raw mass spectral data points, and identity of ions fitted is tagged with the ion molecular formula (isotopes are tagged with text displayed vertically).

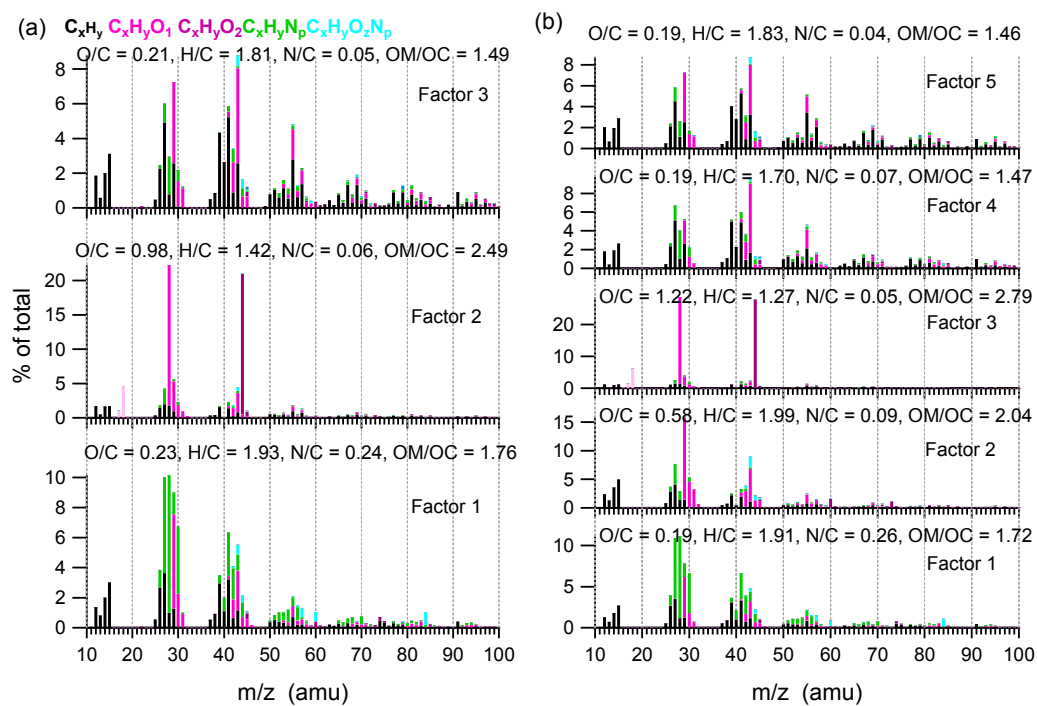

Figure S4. (a) Mass spectral profiles of the three-factor and (b) five-factor solution performed by PMF on WSOA.

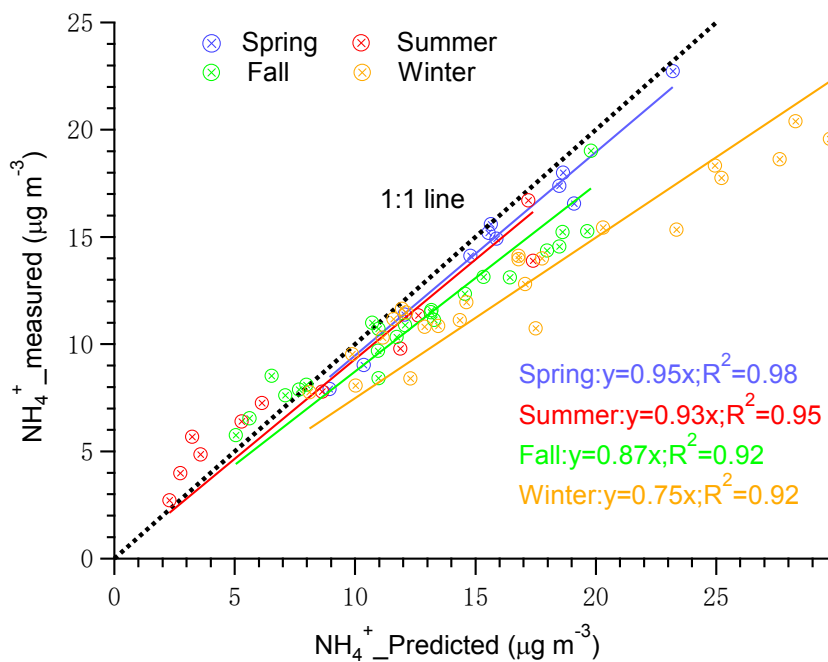

Figure S5. Scatter plots of  $\text{NH}_4^+$ \_measured vs.  $\text{NH}_4^+$ \_predicted. The data points are colored by different seasons. For clarity, 1:1 line was presented.

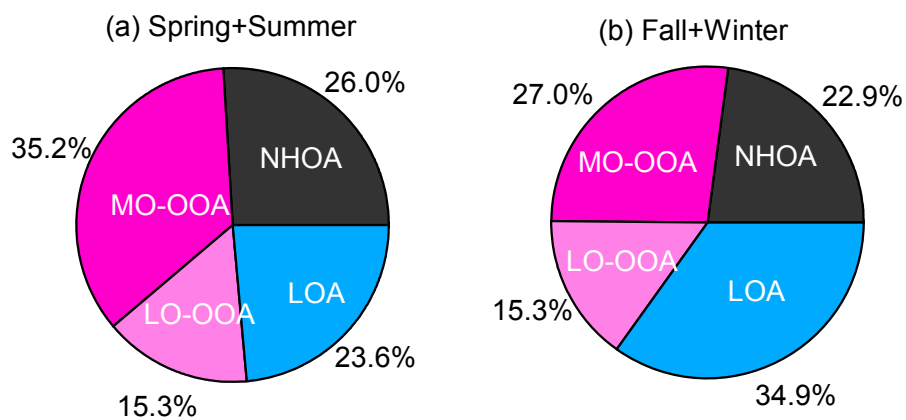

Figure S6. Comparison of mass contributions of four factors to the WSOA in (a) Spring+Summer and (b) Fall+Winter.
